# Supplementary material
Source: PubMed Central journal article supplement (PMC3667660)

## Supplemental Materials

**Supplemental Table 1** Characteristics of 32 established SNPs for BMI

| SNP        | Nearest Gene    | Chr | Allele* |       | Beta (SE)†  | Women (NHS) |                  | Men (HPFS) |                  |
|------------|-----------------|-----|---------|-------|-------------|-------------|------------------|------------|------------------|
|            |                 |     | Effect  | Other |             | EAF         | r <sup>2</sup> ‡ | EAF        | r <sup>2</sup> ‡ |
| rs543874   | <i>SEC16B</i>   | 1   | G       | A     | 0.22 (0.03) | 0.19        | 1.00             | 0.19       | 1.00             |
| rs1514175  | <i>TNNI3K</i>   | 1   | A       | G     | 0.07 (0.02) | 0.42        | 1.00             | 0.40       | 1.00             |
| rs1555543  | <i>PTBP2</i>    | 1   | C       | A     | 0.06 (0.02) | 0.59        | 1.00             | 0.58       | 1.00             |
| rs2815752  | <i>NEGR1</i>    | 1   | A       | G     | 0.13 (0.02) | 0.63        | 1.00             | 0.63       | 1.00             |
| rs2890652  | <i>LRP1B</i>    | 2   | C       | T     | 0.09 (0.03) | 0.17        | 0.99             | 0.17       | 0.99             |
| rs887912   | <i>FANCL</i>    | 2   | T       | C     | 0.10 (0.02) | 0.30        | 0.99             | 0.30       | 0.99             |
| rs713586   | <i>RBJ</i>      | 2   | C       | T     | 0.14 (0.02) | 0.47        | 1.00             | 0.48       | 1.00             |
| rs2867125  | <i>TMEM18</i>   | 2   | C       | T     | 0.31 (0.03) | 0.82        | 1.00             | 0.81       | 1.00             |
| rs13078807 | <i>CADM2</i>    | 3   | G       | A     | 0.10 (0.02) | 0.21        | 0.99             | 0.22       | 0.99             |
| rs9816226  | <i>ETV5</i>     | 3   | T       | A     | 0.14 (0.03) | 0.82        | 0.97             | 0.82       | 0.97             |
| rs13107325 | <i>SLC39A8</i>  | 4   | T       | C     | 0.19 (0.04) | 0.08        | 0.86             | 0.09       | 0.83             |
| rs10938397 | <i>GNPDA2</i>   | 4   | G       | A     | 0.18 (0.02) | 0.44        | 0.98             | 0.44       | 0.99             |
| rs4836133  | <i>ZNF608</i>   | 5   | A       | C     | 0.07 (0.02) | 0.48        | 0.94             | 0.52       | 0.93             |
| rs2112347  | <i>FLJ35779</i> | 5   | T       | G     | 0.10 (0.02) | 0.64        | 0.97             | 0.63       | 0.97             |
| rs987237   | <i>TFAP2B</i>   | 6   | G       | A     | 0.13 (0.03) | 0.18        | 1.00             | 0.18       | 1.00             |
| rs206936   | <i>NUDT3</i>    | 6   | G       | A     | 0.06 (0.02) | 0.20        | 1.00             | 0.20       | 1.00             |
| rs10968576 | <i>LRRN6C</i>   | 9   | G       | A     | 0.11 (0.02) | 0.31        | 1.00             | 0.31       | 1.00             |
| rs3817334  | <i>MTCH2</i>    | 11  | T       | C     | 0.06 (0.02) | 0.42        | 1.00             | 0.41       | 1.00             |
| rs4929949  | <i>RPL27A</i>   | 11  | C       | T     | 0.06 (0.02) | 0.51        | 0.97             | 0.49       | 0.97             |
| rs10767664 | <i>BDNF</i>     | 11  | A       | T     | 0.19 (0.03) | 0.78        | 1.00             | 0.78       | 1.00             |
| rs7138803  | <i>FAIM2</i>    | 12  | A       | G     | 0.12 (0.02) | 0.38        | 1.00             | 0.39       | 1.00             |
| rs4771122  | <i>MTIF3</i>    | 13  | G       | A     | 0.09 (0.03) | 0.22        | 0.95             | 0.21       | 0.95             |
| rs11847697 | <i>PRKD1</i>    | 14  | T       | C     | 0.17 (0.05) | 0.05        | 0.85             | 0.05       | 0.80             |
| rs10150332 | <i>NRXN3</i>    | 14  | C       | T     | 0.13 (0.03) | 0.22        | 1.00             | 0.20       | 1.00             |
| rs2241423  | <i>MAP2K5</i>   | 15  | G       | A     | 0.13 (0.02) | 0.77        | 1.00             | 0.74       | 1.00             |
| rs7359397  | <i>SH2B1</i>    | 16  | T       | C     | 0.15 (0.02) | 0.39        | 0.98             | 0.37       | 0.97             |
| rs1558902  | <i>FTO</i>      | 16  | A       | T     | 0.39 (0.02) | 0.42        | 1.00             | 0.44       | 1.00             |
| rs12444979 | <i>GPRC5B</i>   | 16  | C       | T     | 0.17 (0.03) | 0.86        | 0.99             | 0.86       | 0.98             |
| rs571312   | <i>MC4R</i>     | 18  | A       | C     | 0.23 (0.03) | 0.24        | 1.00             | 0.24       | 1.00             |
| rs29941    | <i>KCTD15</i>   | 19  | G       | A     | 0.06 (0.02) | 0.68        | 1.00             | 0.68       | 1.00             |
| rs3810291  | <i>TMEM160</i>  | 19  | A       | G     | 0.09 (0.02) | 0.65        | 0.70             | 0.64       | 0.71             |
| rs2287019  | <i>QPCTL</i>    | 19  | C       | T     | 0.15 (0.03) | 0.81        | 0.75             | 0.80       | 0.67             |

Chr: chromosome; EAF: effect allele frequency.

\*Allele coding based on the forward strand. Effect allele is the one associated with a higher BMI; and other is the reference allele.

†Effect sizes in kg/m<sup>2</sup> of BMI obtained from GWAS.

‡r<sup>2</sup> refers to the measurement of SNPs imputation quality.

**Supplemental Figure 1** Genetic risk score and body mass index in the NHS and HPFS

The histograms represent the percentage of participants; and the means ( $\pm$ SE) of BMI are plotted, with the trend lines across the genetic risk score.

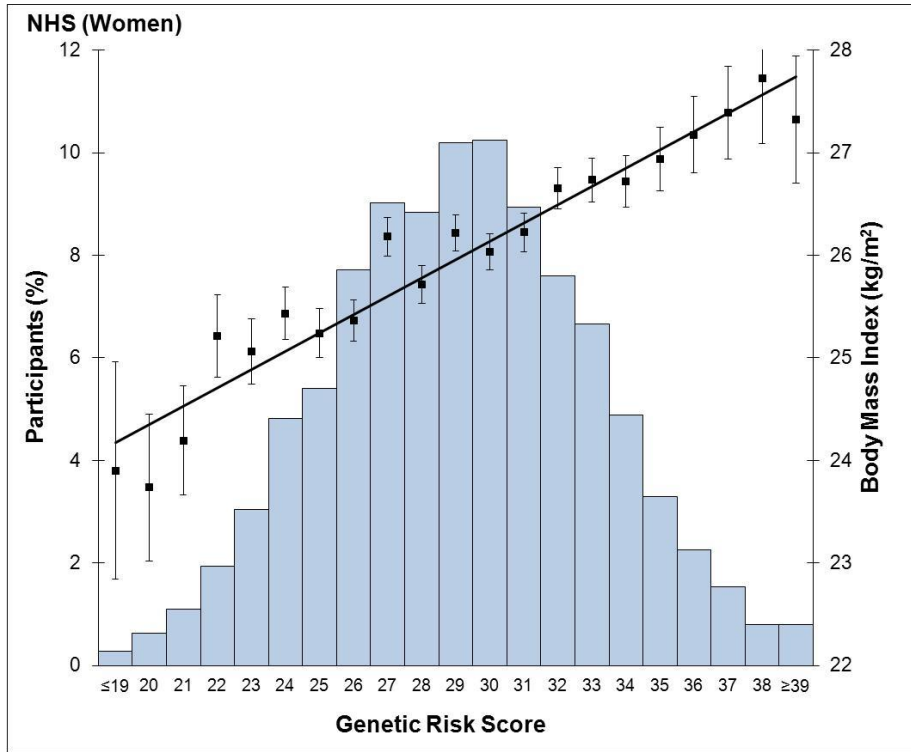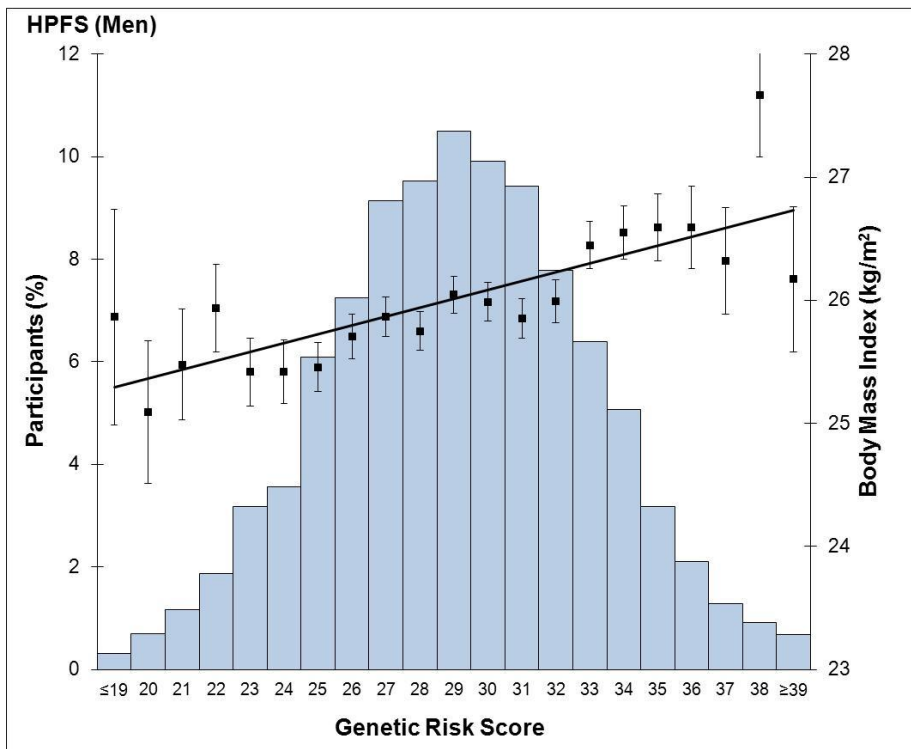

Supplement: NIHMS411452-supplement-4.pdf [file NIHMS411452-supplement-4.pdf]
